# Supplementary material
Source: PubMed Central journal article supplement (PMC1450130)

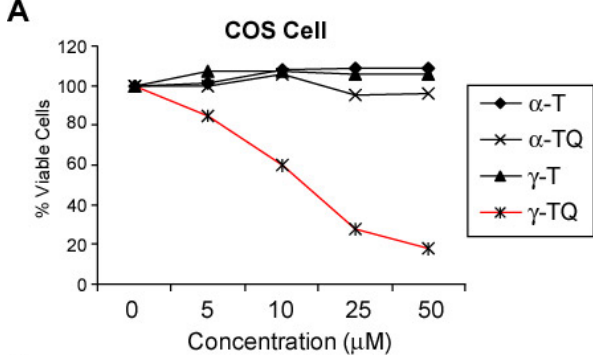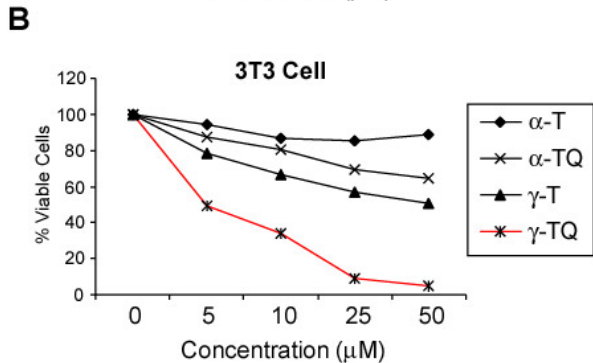

Supplement: pnas_0510962103_1.pdf [file pnas_0510962103_1.pdf]

**A**DTT Prevents  $\gamma$ -TQ Caused Toxicity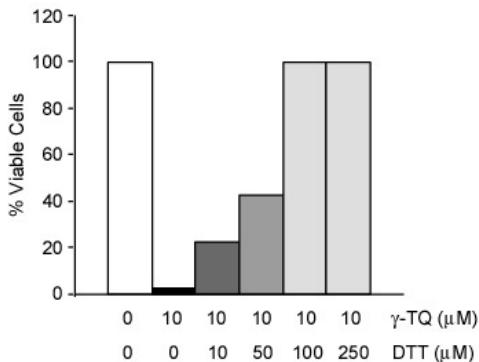**B**

## No Effect with Antioxidants without Thiol Group

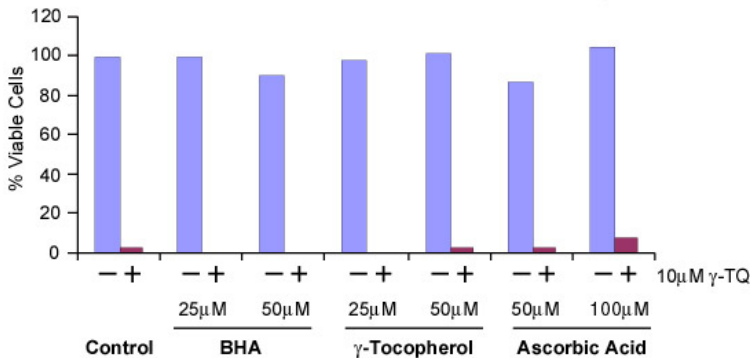

Supplement: pnas_0510962103_2.pdf [file pnas_0510962103_2.pdf]

**A**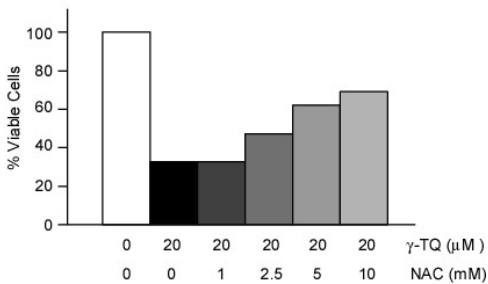**B**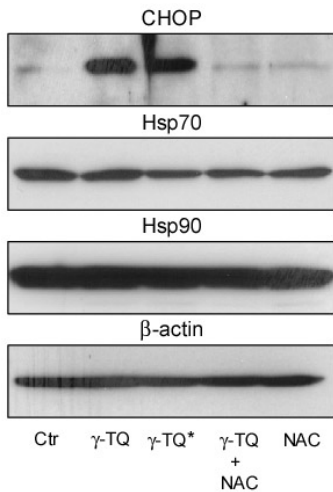

Supplement: pnas_0510962103_3.pdf [file pnas_0510962103_3.pdf]

Protein stain

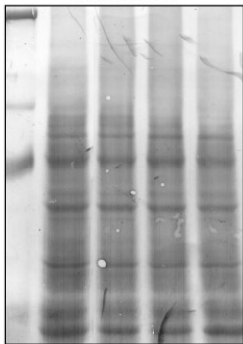

MW      0      0.5      1      3 (hour)

Treatment with  
50 μM BzQ

Supplement: pnas_0510962103_4.pdf [file pnas_0510962103_4.pdf]

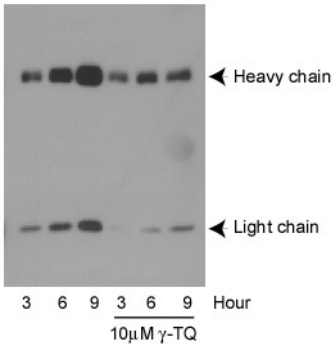

Supplement: pnas_0510962103_5.pdf [file pnas_0510962103_5.pdf]
